# Supplementary material for: Development of a Biomass Component Prediction Model Based on Elemental and Proximate Analyses
Source: MDPI journal article supplement (doi:10.3390/en16145341), 2023-07-13
Supplement: s1 [file s1]

# Development of a Biomass Component Prediction Model Based on Elemental and Proximate Analyses

**Table S1.** Data for model prediction

| .  | Biomass                | Ultimate |      |      |       |      | Proximate |       |       | Structural contents |               |        | Ref |
|----|------------------------|----------|------|------|-------|------|-----------|-------|-------|---------------------|---------------|--------|-----|
|    |                        | C        | H    | N    | O     | S    | VM        | FC    | Ash   | Cellulose           | Hemicellulose | Lignin |     |
| 1  | Pine                   | 51.22    | 6.02 | 0.12 | 42.64 | 0.00 | 82.79     | 16.81 | 0.40  | 38.01               | 27.21         | 34.77  | [1] |
| 2  | Fir                    | 50.01    | 6.07 | 0.15 | 43.77 | 0.00 | 82.88     | 17.00 | 0.12  | 38.21               | 25.71         | 36.08  |     |
| 3  | Spruce                 | 51.25    | 5.95 | 0.12 | 42.68 | 0.00 | 80.37     | 19.39 | 0.24  | 43.47               | 20.54         | 35.99  |     |
| 4  | Coconut shell          | 44.69    | 5.47 | 9.57 | 40.27 | 0.00 | 73.19     | 17.88 | 8.93  | 41.00               | 20.61         | 38.39  | [2] |
| 5  | Bamboo-bottom          | 46.92    | 6.36 | 0.18 | 46.54 | 0.00 | 79.86     | 18.19 | 1.95  | 47.43               | 24.56         | 28.02  | [3] |
| 6  | Bamboo-middle          | 47.04    | 6.42 | 0.18 | 46.36 | 0.00 | 81.14     | 17.43 | 1.43  | 47.95               | 25.01         | 27.05  |     |
| 7  | Bamboo-top             | 46.47    | 6.34 | 0.27 | 46.92 | 0.00 | 79.08     | 18.52 | 2.40  | 47.63               | 25.59         | 26.77  |     |
| 8  | Sugarcane bagasse      | 42.38    | 5.46 | 0.18 | 51.86 | 0.12 | 81.96     | 16.00 | 2.04  | 37.59               | 35.21         | 27.20  | [4] |
| 9  | Sugarcane bagasse-T230 | 48.15    | 4.83 | 0.26 | 46.63 | 0.13 | 73.55     | 23.90 | 2.55  | 34.38               | 14.52         | 51.09  |     |
| 10 | Sugarcane bagasse-T250 | 50.85    | 3.82 | 0.25 | 44.94 | 0.14 | 62.83     | 34.17 | 3.00  | 25.57               | 6.88          | 67.55  |     |
| 11 | Sugarcane bagasse-T270 | 57.10    | 2.76 | 0.30 | 39.69 | 0.15 | 50.98     | 45.13 | 3.89  | 5.64                | 3.18          | 91.19  |     |
| 12 | Sugarcane bagasse-T290 | 59.18    | 2.25 | 0.31 | 38.11 | 0.16 | 46.32     | 49.24 | 4.44  | 0.24                | 1.50          | 98.26  | [5] |
| 13 | Barley straw           | 45.96    | 5.30 | 0.71 | 47.94 | 0.09 | 57.83     | 33.72 | 8.46  | 47.92               | 41.92         | 10.16  |     |
| 14 | Barley straw-225/30    | 46.76    | 5.52 | 1.04 | 46.61 | 0.07 | 58.26     | 33.29 | 8.45  | 48.27               | 39.30         | 12.43  |     |
| 15 | Barley straw-225/60    | 47.98    | 5.10 | 0.99 | 45.82 | 0.11 | 52.39     | 38.38 | 9.23  | 50.94               | 34.21         | 14.85  |     |
| 16 | Cumin stalk            | 43.74    | 4.79 | 0.62 | 50.80 | 0.05 | 54.74     | 35.02 | 10.24 | 66.51               | 17.08         | 16.41  |     |
| 17 | Cumin stalk-225/30     | 46.29    | 4.61 | 0.77 | 48.26 | 0.07 | 49.32     | 40.10 | 10.58 | 57.57               | 16.77         | 25.67  |     |
| 18 | Cumin stalk-275/30     | 52.15    | 4.44 | 0.79 | 42.51 | 0.11 | 40.57     | 49.40 | 10.03 | 38.03               | 7.92          | 54.04  |     |

|    |                          |       |      |      |       |      |       |       |       |       |       |       |     |
|----|--------------------------|-------|------|------|-------|------|-------|-------|-------|-------|-------|-------|-----|
| 19 | Cumin stalk-300/30       | 58.66 | 3.95 | 0.93 | 36.39 | 0.07 | 26.59 | 62.59 | 10.82 | 19.59 | 11.83 | 68.58 |     |
| 20 | Cumin stalk-225/60       | 47.98 | 4.55 | 0.74 | 46.67 | 0.06 | 46.68 | 42.86 | 10.46 | 61.34 | 10.58 | 28.08 |     |
| 21 | Cumin stalk-275/60       | 56.23 | 4.38 | 0.91 | 38.42 | 0.06 | 34.39 | 55.65 | 9.96  | 32.32 | 8.05  | 59.63 |     |
| 22 | Cumin stalk-300/60       | 58.00 | 3.87 | 1.04 | 36.97 | 0.12 | 26.35 | 62.43 | 11.22 | 18.95 | 8.82  | 72.23 |     |
| 23 | Wood                     | 48.77 | 6.77 | 0.10 | 44.36 | 0.00 | 81.12 | 18.61 | 0.27  | 40.49 | 15.74 | 43.77 | [6] |
| 24 | Bamboo                   | 45.43 | 6.27 | 0.07 | 48.22 | 0.00 | 75.83 | 20.55 | 3.62  | 55.01 | 28.03 | 16.96 |     |
| 25 | Banyan                   | 46.72 | 6.15 | 0.08 | 47.05 | 0.00 | 80.21 | 18.64 | 1.15  | 57.07 | 12.19 | 30.74 | [7] |
| 26 | Bamboo-210               | 48.54 | 6.08 | 0.03 | 45.22 | 0.13 | 80.94 | 17.75 | 1.31  | 56.00 | 14.00 | 30.00 |     |
| 27 | Bamboo-240               | 49.97 | 6.03 | 0.01 | 43.88 | 0.11 | 78.27 | 20.38 | 1.35  | 58.59 | 7.07  | 34.34 |     |
| 28 | Bamboo-270               | 53.55 | 5.60 | 0.00 | 40.78 | 0.07 | 71.69 | 26.55 | 1.76  | 53.00 | 2.00  | 45.00 | [7] |
| 29 | Bamboo-300               | 61.23 | 4.80 | 0.00 | 33.93 | 0.04 | 64.80 | 33.22 | 1.98  | 43.00 | 1.00  | 56.00 |     |
| 30 | Sugarcane Bagasse        | 32.50 | 5.01 | 0.38 | 61.55 | 0.56 | 73.78 | 16.99 | 9.23  | 44.78 | 31.92 | 23.30 |     |
| 31 | Sugarcane Bagasse-200/15 | 32.80 | 5.01 | 0.38 | 61.26 | 0.55 | 73.38 | 17.41 | 9.22  | 44.43 | 29.82 | 25.75 |     |
| 32 | Sugarcane Bagasse-200/30 | 33.10 | 4.99 | 0.37 | 61.01 | 0.53 | 72.72 | 18.00 | 9.27  | 43.98 | 28.84 | 27.18 |     |
| 33 | Sugarcane Bagasse-200/45 | 33.90 | 4.99 | 0.37 | 60.22 | 0.52 | 71.73 | 19.09 | 9.17  | 42.45 | 27.94 | 29.61 |     |
| 34 | Sugarcane Bagasse-200/60 | 34.50 | 4.98 | 0.37 | 59.65 | 0.50 | 70.81 | 20.01 | 9.17  | 41.49 | 27.07 | 31.44 |     |
| 35 | Sugarcane Bagasse-225/15 | 34.80 | 4.98 | 0.36 | 59.31 | 0.55 | 70.75 | 20.32 | 8.93  | 44.19 | 28.50 | 27.31 |     |
| 36 | Sugarcane Bagasse-225/30 | 36.20 | 4.97 | 0.36 | 57.95 | 0.52 | 68.84 | 22.33 | 8.83  | 41.63 | 26.56 | 31.82 |     |
| 37 | Sugarcane Bagasse-225/45 | 36.90 | 4.88 | 0.35 | 57.37 | 0.50 | 66.92 | 24.05 | 9.03  | 39.57 | 26.10 | 34.33 |     |
| 38 | Sugarcane Bagasse-225/60 | 38.01 | 4.82 | 0.35 | 56.33 | 0.49 | 64.89 | 26.06 | 9.05  | 38.41 | 24.14 | 37.46 | [8] |
| 39 | Sugarcane Bagasse-250/15 | 37.10 | 4.87 | 0.35 | 57.17 | 0.51 | 66.63 | 24.39 | 8.99  | 40.14 | 25.69 | 34.17 |     |
| 40 | Sugarcane Bagasse-250/30 | 39.20 | 4.71 | 0.34 | 55.27 | 0.48 | 62.22 | 28.60 | 9.19  | 37.35 | 23.99 | 38.66 |     |
| 41 | Sugarcane Bagasse-250/45 | 40.50 | 4.69 | 0.33 | 54.02 | 0.46 | 60.39 | 30.53 | 9.08  | 36.23 | 23.60 | 40.17 |     |
| 42 | Sugarcane Bagasse-250/60 | 42.60 | 4.66 | 0.33 | 51.99 | 0.42 | 57.37 | 33.67 | 8.95  | 34.24 | 20.81 | 44.95 |     |
| 43 | Sugarcane Bagasse-275/15 | 39.60 | 4.61 | 0.34 | 54.96 | 0.49 | 60.67 | 29.96 | 9.37  | 35.85 | 23.62 | 40.53 |     |
| 44 | Sugarcane Bagasse-275/30 | 42.10 | 4.32 | 0.32 | 52.83 | 0.43 | 54.19 | 35.85 | 9.96  | 30.91 | 21.00 | 48.09 |     |
| 45 | Sugarcane Bagasse-275/45 | 43.20 | 4.22 | 0.32 | 51.86 | 0.40 | 51.62 | 38.22 | 10.17 | 26.40 | 19.14 | 54.46 |     |

|    |                          |       |      |      |       |      |       |       |       |       |       |       |      |
|----|--------------------------|-------|------|------|-------|------|-------|-------|-------|-------|-------|-------|------|
| 46 | Sugarcane Bagasse-275/60 | 45.60 | 4.12 | 0.31 | 49.58 | 0.39 | 47.63 | 42.30 | 10.08 | 25.27 | 18.39 | 56.35 | [9]  |
| 47 | Sugarcane Bagasse-300/15 | 40.60 | 3.90 | 0.29 | 54.83 | 0.38 | 51.06 | 37.43 | 11.52 | 24.37 | 12.73 | 62.91 |      |
| 48 | Sugarcane Bagasse-300/30 | 48.30 | 3.80 | 0.27 | 47.28 | 0.35 | 40.73 | 48.66 | 10.61 | 22.16 | 10.06 | 67.78 |      |
| 49 | Sugarcane Bagasse-300/45 | 49.60 | 3.60 | 0.25 | 46.25 | 0.30 | 36.76 | 52.15 | 11.10 | 20.07 | 7.89  | 72.04 |      |
| 50 | Sugarcane Bagasse-300/60 | 50.30 | 3.40 | 0.22 | 45.79 | 0.29 | 33.72 | 54.76 | 11.53 | 18.83 | 5.72  | 75.45 |      |
| 51 | Corn stalk               | 43.15 | 8.00 | 2.22 | 46.39 | 0.24 | 65.69 | 8.90  | 25.41 | 40.30 | 40.98 | 18.72 |      |
| 52 | Wheat straw              | 42.86 | 6.86 | 2.29 | 47.82 | 0.18 | 59.13 | 16.71 | 24.15 | 47.62 | 37.85 | 14.52 |      |
| 53 | Poplar wood              | 51.38 | 6.40 | 1.94 | 40.10 | 0.18 | 54.94 | 31.35 | 13.72 | 55.31 | 15.50 | 29.19 |      |
| 54 | Cedar wood               | 57.22 | 6.74 | 1.79 | 34.06 | 0.20 | 52.29 | 35.70 | 12.01 | 51.39 | 13.06 | 35.55 |      |
| 55 | Bamboo-220/10            | 48.73 | 6.03 | 0.00 | 45.24 | 0.00 | 64.58 | 30.72 | 4.71  | 46.28 | 26.33 | 27.39 | [10] |
| 56 | Bamboo-220/30            | 49.23 | 5.95 | 0.00 | 44.83 | 0.00 | 63.09 | 32.06 | 4.85  | 46.91 | 25.59 | 27.50 |      |
| 57 | Bamboo-220/60            | 49.29 | 5.94 | 0.00 | 44.77 | 0.00 | 62.90 | 32.23 | 4.87  | 46.73 | 24.79 | 28.48 |      |
| 58 | Bamboo-240/10            | 49.92 | 5.78 | 0.00 | 44.31 | 0.00 | 60.35 | 34.43 | 5.23  | 46.87 | 24.81 | 28.32 |      |
| 59 | Bamboo-240/30            | 49.53 | 5.79 | 0.00 | 44.68 | 0.00 | 60.91 | 33.82 | 5.27  | 48.24 | 22.73 | 29.03 |      |
| 60 | Bamboo-240/60            | 50.49 | 5.88 | 0.00 | 43.63 | 0.00 | 60.80 | 34.35 | 4.85  | 48.97 | 19.01 | 32.02 |      |
| 61 | Bamboo-260/10            | 51.03 | 6.00 | 0.00 | 42.97 | 0.00 | 61.52 | 34.07 | 4.40  | 53.44 | 20.06 | 26.51 |      |
| 62 | Bamboo-260/30            | 51.89 | 6.11 | 0.00 | 42.00 | 0.00 | 61.76 | 34.28 | 3.95  | 53.05 | 14.39 | 32.55 |      |
| 63 | Bamboo-260/60            | 52.64 | 6.21 | 0.00 | 41.15 | 0.00 | 62.01 | 34.45 | 3.54  | 50.47 | 12.16 | 37.37 |      |
| 64 | Bamboo-280/10            | 53.68 | 6.21 | 0.00 | 40.11 | 0.00 | 60.79 | 35.85 | 3.37  | 50.70 | 8.76  | 40.54 | [11] |
| 65 | Bamboo-280/30            | 54.15 | 6.20 | 0.00 | 39.65 | 0.00 | 60.12 | 36.56 | 3.32  | 50.39 | 5.67  | 43.95 |      |
| 66 | Bamboo-280/60            | 55.42 | 5.98 | 0.00 | 38.60 | 0.00 | 56.12 | 40.15 | 3.74  | 47.40 | 2.20  | 50.40 |      |
| 67 | Plumeria alba            | 44.50 | 6.10 | 0.60 | 48.80 | 0.00 | 68.52 | 25.03 | 6.45  | 41.44 | 27.75 | 30.81 |      |
| 68 | Humulus lupulus -180     | 45.10 | 5.90 | 1.30 | 47.70 | 0.00 | 63.39 | 28.20 | 8.41  | 38.25 | 19.45 | 42.30 |      |
| 69 | Humulus lupulus -200     | 49.70 | 6.40 | 1.90 | 42.00 | 0.00 | 61.79 | 30.75 | 7.46  | 38.49 | 19.90 | 41.61 |      |
| 70 | Humulus lupulus -220     | 52.80 | 6.40 | 1.90 | 38.90 | 0.00 | 58.09 | 34.96 | 6.95  | 31.49 | 25.06 | 43.44 |      |
| 71 | Humulus lupulus -240     | 55.90 | 6.00 | 2.20 | 35.90 | 0.00 | 48.83 | 42.93 | 8.24  | 32.20 | 13.97 | 53.83 |      |
| 72 | Humulus lupulus -260     | 60.50 | 6.00 | 2.70 | 30.80 | 0.00 | 41.68 | 49.78 | 8.54  | 22.26 | 11.94 | 65.81 |      |

|    |                      |       |      |      |       |      |       |       |       |       |       |       |      |
|----|----------------------|-------|------|------|-------|------|-------|-------|-------|-------|-------|-------|------|
| 73 | Pine                 | 51.15 | 6.18 | 0.30 | 42.37 | 0.00 | 62.76 | 33.04 | 4.20  | 40.64 | 28.90 | 30.45 | [12] |
| 74 | Ash-wood             | 49.25 | 5.91 | 0.30 | 44.54 | 0.00 | 61.56 | 32.74 | 5.70  | 44.72 | 25.11 | 30.16 |      |
| 75 | Miscanthus           | 48.16 | 5.98 | 0.30 | 45.56 | 0.00 | 64.03 | 30.70 | 5.27  | 51.52 | 25.70 | 22.77 |      |
| 76 | Wheat straw          | 45.15 | 5.69 | 0.80 | 48.35 | 0.00 | 62.60 | 29.55 | 7.84  | 44.47 | 28.55 | 26.97 |      |
| 77 | Peach pit            | 55.33 | 6.16 | 0.00 | 38.51 | 0.00 | 84.80 | 13.90 | 1.30  | 39.41 | 26.23 | 34.36 | [13] |
| 78 | Marc                 | 59.28 | 6.64 | 0.00 | 34.07 | 0.00 | 69.21 | 21.98 | 8.81  | 26.29 | 8.52  | 65.20 |      |
| 79 | Stalk                | 51.60 | 6.42 | 0.00 | 41.98 | 0.00 | 66.77 | 23.07 | 10.16 | 30.46 | 10.99 | 58.55 |      |
| 80 | Sawdust              | 48.32 | 5.19 | 0.00 | 46.49 | 0.00 | 86.31 | 11.79 | 1.90  | 47.87 | 22.27 | 29.86 |      |
| 81 | Poplar wood          | 51.47 | 5.91 | 1.53 | 41.09 | 0.00 | 73.85 | 18.61 | 7.54  | 50.00 | 26.00 | 24.00 | [14] |
| 82 | Poplar leaf          | 49.70 | 5.26 | 1.32 | 43.72 | 0.00 | 68.74 | 15.57 | 15.69 | 27.00 | 33.00 | 40.00 |      |
| 83 | Chinar leaf          | 53.12 | 4.90 | 1.02 | 40.96 | 0.00 | 69.74 | 21.03 | 9.23  | 30.00 | 26.00 | 44.00 | [15] |
| 84 | Bamboo               | 51.50 | 5.23 | 0.32 | 42.90 | 0.05 | 81.54 | 16.12 | 2.34  | 48.38 | 27.51 | 24.11 |      |
| 85 | Pinewood             | 49.02 | 6.40 | 0.14 | 44.42 | 0.01 | 87.47 | 10.93 | 1.59  | 45.88 | 40.00 | 14.12 | [16] |
| 86 | Bamboo               | 43.23 | 5.65 | 0.64 | 50.48 | 0.00 | 78.73 | 14.17 | 7.10  | 54.38 | 28.44 | 17.18 | [17] |
| 87 | Peanut shell         | 41.38 | 5.75 | 2.30 | 50.57 | 0.00 | 76.87 | 5.11  | 18.01 | 49.67 | 14.84 | 35.49 |      |
| 88 | Chestnut shell       | 41.41 | 5.33 | 0.85 | 52.41 | 0.00 | 77.24 | 17.67 | 5.09  | 28.92 | 21.85 | 49.23 | [18] |
| 89 | Switchgrass          | 49.02 | 6.04 | 0.19 | 44.44 | 0.32 | 61.37 | 29.85 | 8.78  | 42.50 | 34.30 | 23.20 |      |
| 90 | Wheat straw          | 48.91 | 5.66 | 0.69 | 44.61 | 0.12 | 49.95 | 32.07 | 17.98 | 47.40 | 31.82 | 20.77 |      |
| 91 | Eastern redcedar     | 51.92 | 6.07 | 0.38 | 41.63 | 0.00 | 58.87 | 34.69 | 6.44  | 42.83 | 19.02 | 38.15 |      |
| 92 | Hybrid poplar        | 49.95 | 5.99 | 0.40 | 43.66 | 0.00 | 84.00 | 14.70 | 1.30  | 52.02 | 17.46 | 30.52 | [19] |
| 93 | Softwood (av.)       | 51.80 | 6.10 | 0.30 | 41.80 | 0.00 | 81.30 | 16.60 | 2.10  | 43.72 | 26.06 | 30.22 |      |
| 94 | Hardwood (av.)       | 50.15 | 6.09 | 0.60 | 43.16 | 0.00 | 85.10 | 13.10 | 1.80  | 50.80 | 29.70 | 19.50 |      |
| 95 | Corn stover 2 (CRS2) | 47.10 | 5.70 | 0.60 | 46.60 | 0.00 | 78.10 | 15.60 | 6.30  | 48.86 | 29.49 | 21.65 |      |
| 96 | Switchgrass          | 47.10 | 5.90 | 0.60 | 46.40 | 0.00 | 82.40 | 13.60 | 4.00  | 45.42 | 29.08 | 25.50 |      |
| 97 | Sorghum              | 46.40 | 5.70 | 1.00 | 46.90 | 0.00 | 77.00 | 15.80 | 7.20  | 50.89 | 27.40 | 21.71 |      |
| 98 | Mixed grasses        | 47.60 | 5.80 | 1.40 | 45.20 | 0.00 | 78.60 | 14.80 | 6.60  | 47.15 | 27.24 | 25.61 |      |
| 99 | Miscanthus           | 48.85 | 5.79 | 0.40 | 44.96 | 0.00 | 82.50 | 14.90 | 2.60  | 48.56 | 25.09 | 26.34 |      |

|     |                            |       |      |      |       |      |       |       |       |       |       |       |      |
|-----|----------------------------|-------|------|------|-------|------|-------|-------|-------|-------|-------|-------|------|
| 100 | Pine                       | 51.50 | 6.10 | 0.20 | 42.20 | 0.00 | 83.50 | 15.80 | 0.70  | 48.42 | 22.37 | 29.21 | [20] |
| 101 | Rice straw                 | 37.96 | 4.90 | 1.40 | 55.74 | 0.00 | 68.30 | 14.80 | 16.90 | 40.52 | 29.90 | 29.58 |      |
| 102 | Leuceana wood              | 44.84 | 5.61 | 1.80 | 47.75 | 0.00 | 92.60 | 0.60  | 6.80  | 36.49 | 27.02 | 36.49 |      |
| 103 | Oil palm empty fruit bunch | 51.00 | 7.10 | 0.60 | 41.30 | 0.00 | 83.80 | 8.40  | 7.80  | 39.75 | 33.91 | 26.35 |      |
| 104 | Sugarcane top and leave    | 51.70 | 4.10 | 2.20 | 42.00 | 0.00 | 88.20 | 9.40  | 2.40  | 35.07 | 27.70 | 37.23 |      |
| 105 | Eucalyptus                 | 47.25 | 5.79 | 0.80 | 46.15 | 0.00 | 88.90 | 9.90  | 1.20  | 38.94 | 31.36 | 29.70 |      |
| 106 | Impereta cylindrical       | 50.05 | 5.91 | 1.10 | 42.94 | 0.00 | 91.90 | 0.50  | 7.60  | 47.82 | 11.78 | 40.40 |      |
| 107 | Napier grass               | 37.30 | 4.50 | 2.40 | 55.80 | 0.00 | 83.10 | 13.90 | 3.00  | 39.61 | 33.51 | 26.88 | [16] |
| 108 | Rice husk                  | 43.60 | 5.70 | 0.70 | 50.00 | 0.00 | 73.80 | 10.50 | 15.70 | 40.77 | 29.82 | 29.41 |      |
| 109 | Wheat straw 1 (WS1)        | 51.50 | 6.10 | 0.20 | 42.20 | 0.00 | 83.50 | 15.80 | 0.70  | 40.61 | 34.39 | 25.00 |      |
| 110 | Barley straw               | 41.44 | 6.21 | 0.60 | 51.75 | 0.00 | 84.30 | 5.20  | 10.50 | 40.02 | 31.65 | 28.33 |      |
| 111 | Flax straw                 | 43.16 | 6.19 | 0.70 | 49.95 | 0.00 | 87.10 | 9.60  | 3.30  | 36.79 | 34.36 | 28.85 |      |
| 112 | Pinewood                   | 49.00 | 6.20 | 0.40 | 44.40 | 0.00 | 83.30 | 11.00 | 5.70  | 45.88 | 40.00 | 14.12 |      |
| 113 | Timothy grass              | 42.50 | 6.00 | 1.00 | 50.50 | 0.00 | 82.00 | 16.80 | 1.20  | 37.95 | 33.13 | 28.92 | [21] |
| 114 | Rice straw (RS)            | 45.95 | 7.91 | 0.20 | 45.95 | 0.00 | 72.20 | 12.60 | 15.20 | 54.51 | 28.47 | 17.02 |      |
| 115 | Wheat Straw 2 (WS2)        | 46.95 | 5.59 | 0.50 | 46.95 | 0.00 | 70.50 | 17.80 | 11.70 | 48.28 | 24.93 | 26.78 |      |
| 116 | Sugarcane baggase (SCB)    | 46.45 | 6.69 | 0.40 | 46.45 | 0.00 | 84.40 | 10.70 | 4.90  | 48.74 | 24.90 | 26.36 |      |
| 117 | Corn stover 1 (CRS1)       | 46.60 | 6.40 | 0.40 | 46.60 | 0.00 | 79.30 | 8.60  | 12.10 | 42.75 | 24.77 | 32.48 |      |
| 118 | Sorghum stalk (SS)         | 46.50 | 6.50 | 0.50 | 46.50 | 0.00 | 72.30 | 18.10 | 9.60  | 49.44 | 24.30 | 26.26 |      |
| 119 | Mustard stalk (MS)         | 46.70 | 6.30 | 0.30 | 46.70 | 0.00 | 77.60 | 13.60 | 8.80  | 48.95 | 23.17 | 27.88 |      |
| 120 | Jatropha wood (JW)         | 46.55 | 5.99 | 0.90 | 46.55 | 0.00 | 77.60 | 16.80 | 5.60  | 48.14 | 20.35 | 31.51 | [22] |
| 121 | Corn cob 1 (CC1)           | 46.70 | 6.20 | 0.40 | 46.70 | 0.00 | 89.00 | 4.70  | 6.30  | 41.82 | 37.66 | 20.52 |      |
| 122 | Cotton stalk (CS)          | 46.65 | 6.39 | 0.30 | 46.65 | 0.00 | 78.00 | 18.20 | 3.80  | 48.17 | 23.47 | 28.36 |      |
| 123 | Rice husk (RH)             | 46.20 | 6.30 | 0.40 | 47.10 | 0.00 | 74.00 | 21.40 | 4.60  | 44.57 | 19.12 | 36.31 |      |
| 124 | Beech wood                 | 47.25 | 6.21 | 0.30 | 46.25 | 0.00 | 86.20 | 13.40 | 0.40  | 46.03 | 31.96 | 22.01 |      |
| 125 | Birchwood                  | 48.40 | 5.60 | 0.20 | 45.80 | 0.00 | 78.80 | 20.90 | 0.30  | 31.57 | 49.14 | 19.29 |      |
| 126 | Furniture sawdust          | 47.40 | 5.70 | 0.20 | 46.70 | 0.00 | 85.50 | 13.70 | 0.80  | 35.43 | 40.43 | 24.13 |      |

|     |                                             |       |      |      |       |      |       |       |       |       |       |       |      |
|-----|---------------------------------------------|-------|------|------|-------|------|-------|-------|-------|-------|-------|-------|------|
| 127 | Hardwood (av.)                              | 46.40 | 6.60 | 0.60 | 46.40 | 0.00 | 70.90 | 9.80  | 19.30 | 46.03 | 31.87 | 22.10 |      |
| 128 | Softwood (av.)                              | 52.45 | 6.11 | 0.20 | 41.24 | 0.00 | 70.10 | 28.20 | 1.70  | 46.64 | 24.85 | 28.51 |      |
| 129 | Spruce wood                                 | 48.50 | 6.30 | 0.40 | 44.80 | 0.00 | 83.40 | 16.10 | 0.50  | 51.06 | 21.31 | 27.64 |      |
| 130 | Almond shell                                | 54.80 | 7.50 | 0.30 | 37.40 | 0.00 | 91.80 | 5.60  | 2.60  | 34.24 | 33.06 | 32.70 |      |
| 131 | Hazelnut shell                              | 57.60 | 7.20 | 5.70 | 29.50 | 0.00 | 68.00 | 27.80 | 4.20  | 25.42 | 17.43 | 57.16 |      |
| 132 | Sugarcane Baggase                           | 47.90 | 6.40 | 0.30 | 45.40 | 0.00 | 93.20 | 1.80  | 5.00  | 41.03 | 34.62 | 24.36 |      |
| 133 | Corn cob 2 (CC2)                            | 44.20 | 5.90 | 0.70 | 49.20 | 0.00 | 80.60 | 18.20 | 1.20  | 47.98 | 34.17 | 17.86 |      |
| 134 | Wood chips                                  | 46.40 | 5.90 | 0.10 | 47.60 | 0.00 | 88.80 | 10.90 | 0.30  | 38.50 | 38.50 | 23.00 |      |
| 135 | Ailanthus wood                              | 51.00 | 6.40 | 0.30 | 42.30 | 0.00 | 74.40 | 25.10 | 0.50  | 46.93 | 26.73 | 26.33 |      |
| 136 | Napier grass stem                           | 48.80 | 6.00 | 1.00 | 44.20 | 0.00 | 81.50 | 16.70 | 1.80  | 45.33 | 23.13 | 31.54 |      |
| 137 | Napier grass leaf                           | 44.30 | 5.50 | 1.00 | 49.20 | 0.00 | 79.10 | 16.90 | 4.00  | 38.94 | 21.19 | 39.87 | [23] |
| 138 | Napier grass stem and leaf                  | 45.10 | 5.90 | 1.50 | 47.50 | 0.00 | 85.20 | 8.50  | 6.30  | 43.35 | 25.86 | 30.80 |      |
| 139 | Echinochloa stagnina                        | 38.14 | 5.01 | 3.10 | 53.75 | 0.00 | 80.90 | 10.10 | 9.00  | 47.88 | 26.92 | 25.19 |      |
| 140 | Eragrostis airoides                         | 41.04 | 6.71 | 1.10 | 51.15 | 0.00 | 91.60 | 4.40  | 4.00  | 51.12 | 12.66 | 36.21 | [24] |
| 141 | Arundinella khasiana                        | 41.26 | 5.39 | 1.30 | 52.05 | 0.00 | 89.40 | 1.50  | 9.10  | 55.45 | 21.52 | 23.03 |      |
| 142 | Rice husk                                   | 48.90 | 6.20 | 0.80 | 44.10 | 0.00 | 72.80 | 9.30  | 17.90 | 35.05 | 35.05 | 29.90 | [25] |
| 143 | Timothy grass (TG)                          | 45.15 | 6.31 | 1.30 | 47.25 | 0.00 | 82.90 | 13.30 | 3.80  | 47.72 | 30.71 | 21.58 |      |
| 144 | Hydrothermally treated timothy grass (TGHT) | 45.90 | 7.10 | 1.10 | 45.90 | 0.00 | 78.90 | 15.30 | 5.80  | 64.76 | 11.32 | 23.92 |      |
| 145 | Hydrothermally treated wheat straw (WSHT)   | 47.70 | 8.50 | 0.20 | 43.60 | 0.00 | 80.70 | 12.80 | 6.50  | 68.05 | 9.48  | 22.47 |      |
| 146 | Pinewood (PW)                               | 50.10 | 6.30 | 0.10 | 43.50 | 0.00 | 76.90 | 20.60 | 2.50  | 51.89 | 23.34 | 24.77 | [26] |
| 147 | Wheat straw (WS)                            | 46.20 | 6.30 | 0.40 | 47.10 | 0.00 | 73.97 | 21.42 | 4.60  | 54.29 | 24.69 | 21.03 |      |
| 148 | Hydrothermally treated pinewood (PWHT )     | 48.55 | 7.01 | 0.10 | 44.34 | 0.00 | 76.00 | 19.20 | 4.80  | 68.80 | 4.61  | 26.60 |      |
| 149 | Bamboo                                      | 39.00 | 6.10 | 0.60 | 54.30 | 0.00 | 77.60 | 19.60 | 2.80  | 53.25 | 17.26 | 29.48 | [27] |
| 150 | Rape straw 1                                | 48.35 | 5.79 | 1.20 | 44.66 | 0.00 | 80.60 | 12.50 | 6.90  | 41.64 | 34.77 | 23.59 |      |
| 151 | Wheat straw                                 | 47.20 | 6.00 | 0.70 | 46.10 | 0.00 | 79.90 | 15.20 | 4.90  | 45.92 | 33.20 | 20.89 |      |
| 152 | Reed canary grass                           | 48.05 | 6.09 | 0.30 | 45.55 | 0.00 | 81.50 | 13.70 | 4.80  | 38.71 | 58.06 | 3.23  | [28] |
| 153 | Switchgrass                                 | 49.00 | 6.20 | 0.40 | 44.40 | 0.00 | 83.28 | 11.01 | 5.71  | 48.85 | 42.88 | 8.28  |      |

|     |                            |       |      |      |       |      |       |       |       |       |       |       |      |
|-----|----------------------------|-------|------|------|-------|------|-------|-------|-------|-------|-------|-------|------|
| 154 | Sugarcane straw (SCS)      | 46.35 | 5.79 | 0.60 | 47.25 | 0.00 | 77.58 | 15.92 | 6.51  | 43.76 | 22.48 | 33.77 | [29] |
| 155 | Sawdust                    | 46.40 | 7.00 | 1.20 | 45.40 | 0.00 | 79.97 | 7.31  | 12.72 | 40.10 | 26.70 | 33.20 | [30] |
| 156 | Rice husk                  | 46.80 | 6.20 | 0.40 | 46.60 | 0.00 | 60.30 | 17.00 | 22.70 | 43.75 | 31.25 | 25.00 | [31] |
| 157 | Hazelnut shell             | 51.40 | 5.20 | 0.20 | 43.20 | 0.00 | 77.09 | 21.48 | 1.43  | 26.62 | 29.70 | 43.68 | [32] |
| 158 | Oil palm empty fruit bunch | 46.27 | 6.71 | 1.35 | 45.67 | 0.00 | 75.30 | 17.81 | 6.89  | 42.21 | 17.91 | 39.88 | [33] |
| 159 | Cocoa Husks                | 48.75 | 6.61 | 2.60 | 42.04 | 0.00 | 85.10 | 6.90  | 8.00  | 38.01 | 41.33 | 20.66 | [34] |
| 160 | Coffee Pellets             | 50.55 | 6.49 | 3.10 | 39.86 | 0.00 | 86.20 | 5.20  | 8.60  | 38.73 | 28.39 | 32.88 |      |
| 161 | Rice Husk                  | 40.40 | 5.30 | 0.50 | 53.80 | 0.00 | 83.40 | 12.00 | 4.60  | 42.91 | 17.62 | 39.47 |      |
| 162 | Hazelnut Shells            | 56.16 | 6.41 | 1.60 | 35.84 | 0.00 | 77.10 | 21.10 | 1.80  | 33.33 | 28.31 | 38.36 |      |
| 163 | Sugar cane bagasse         | 47.50 | 5.50 | 0.50 | 46.50 | 0.00 | 85.13 | 12.16 | 2.71  | 40.66 | 34.28 | 25.06 | [35] |
| 164 | Bagasse                    | 47.75 | 5.61 | 0.10 | 46.55 | 0.00 | 85.91 | 11.39 | 2.70  | 48.52 | 29.58 | 21.90 | [36] |
| 165 | Corncob                    | 47.20 | 6.00 | 0.50 | 46.30 | 0.00 | 80.92 | 15.88 | 3.20  | 41.86 | 35.08 | 23.06 |      |
| 166 | Patula pine (RAW)          | 55.70 | 7.14 | 0.19 | 36.97 | 0.00 | 83.83 | 15.85 | 0.32  | 48.95 | 9.24  | 41.81 | [37] |
| 167 | Patula pine (180-30)       | 55.15 | 7.20 | 0.15 | 37.50 | 0.00 | 82.22 | 17.43 | 0.35  | 49.52 | 9.65  | 40.82 |      |
| 168 | Patula pine (180-75)       | 55.40 | 6.96 | 0.00 | 37.64 | 0.00 | 81.49 | 18.15 | 0.36  | 62.29 | 8.79  | 28.92 |      |
| 169 | Patula pine (180-120)      | 56.45 | 6.60 | 0.48 | 36.47 | 0.00 | 80.78 | 18.87 | 0.35  | 54.64 | 10.40 | 34.96 |      |
| 170 | Patula pine (210-30)       | 56.91 | 6.74 | 0.44 | 35.91 | 0.00 | 80.92 | 18.72 | 0.36  | 56.58 | 7.63  | 35.79 |      |
| 171 | Patula pine (210-75)       | 58.15 | 6.59 | 0.22 | 35.04 | 0.00 | 78.46 | 21.16 | 0.38  | 36.67 | 5.99  | 57.34 |      |
| 172 | Patula pine (240-30)       | 76.03 | 3.75 | 0.35 | 19.87 | 0.00 | 28.59 | 70.48 | 0.93  | 2.35  | 9.71  | 87.93 |      |
| 173 | Patula pine (240-75)       | 72.58 | 2.49 | 0.02 | 24.91 | 0.00 | 32.01 | 66.78 | 1.21  | 4.29  | 3.41  | 92.30 |      |
| 174 | Patula pine (240-120)      | 71.17 | 2.65 | 0.08 | 26.10 | 0.00 | 33.90 | 64.87 | 1.23  | 1.95  | 3.29  | 94.76 |      |

## Reference

1. Peng, J.; Bi, X.T.; Lim, J.; Sokhansanj, S. Development of Torrefaction Kinetics for British Columbia Softwoods. *International Journal of Chemical Reactor Engineering* 2012, 10, doi:10.1515/1542-6580.2878.
2. Chen, W.H.; Kuo, P.C. A Study on Torrefaction of Various Biomass Materials and Its Impact on Lignocellulosic Structure Simulated by a Thermogravimetry. *Energy* 2010, 35, 2580–2586, doi:10.1016/j.energy.2010.02.054.
3. Rousset, P.; Aguiar, C.; Labbé, N.; Commandré, J.M. Enhancing the Combustible Properties of Bamboo by Torrefaction. *Bioresour Technol* 2011, 102, 8225–8231, doi:10.1016/j.biortech.2011.05.093.
4. Granados, D.A.; Ruiz, R.A.; Vega, L.Y.; Chejne, F. Study of Reactivity Reduction in Sugarcane Bagasse as Consequence of a Torrefaction Process. *Energy* 2017, 139, 818–827, doi:10.1016/j.energy.2017.08.013.
5. Cahyanti, M.N.; Doddapaneni, T.R.K.C.; Madisoo, M.; Pärn, L.; Virro, I.; Kikas, T. Torrefaction of Agricultural and Wood Waste: Comparative Analysis of Selected Fuel Characteristics. *Energies (Basel)* 2021, 14, doi:10.3390/en14102774.
6. Chen, W.H.; Hsu, H.C.; Lu, K.M.; Lee, W.J.; Lin, T.C. Thermal Pretreatment of Wood (Lauan) Block by Torrefaction and Its Influence on the Properties of the Biomass. *Energy* 2011, 36, 3012–3021, doi:10.1016/j.energy.2011.02.045.
7. Ma, Z.; Zhang, Y.; Shen, Y.; Wang, J.; Yang, Y.; Zhang, W.; Wang, S. Oxygen Migration Characteristics during Bamboo Torrefaction Process Based on the Properties of Torrefied Solid, Gaseous, and Liquid Products. *Biomass Bioenergy* 2019, 128, doi:10.1016/j.biombioe.2019.105300.
8. Kanwal, S.; Chaudhry, N.; Munir, S.; Sana, H. Effect of Torrefaction Conditions on the Physicochemical Characterization of Agricultural Waste (Sugarcane Bagasse). *Waste Management* 2019, 88, 280–290, doi:10.1016/j.wasman.2019.03.053.
9. Jiang, H.; Ye, Y.; Lu, P.; Zhao, M.; Xu, G.; Chen, D.; Song, T. Effects of Torrefaction Conditions on the Hygroscopicity of Biochars. *Journal of the Energy Institute* 2021, 96, 260–268, doi:10.1016/j.joei.2021.03.018.
10. Li, M.F.; Chen, C.Z.; Li, X.; Shen, Y.; Bian, J.; Sun, R.C. Torrefaction of Bamboo under Nitrogen Atmosphere: Influence of Temperature and Time on the Structure and Properties of the Solid Product. *Fuel* 2015, 161, 193–196, doi:10.1016/j.fuel.2015.08.052.
11. Yang, W.; Shimanouchi, T.; Iwamura, M.; Takahashi, Y.; Mano, R.; Takashima, K.; Tanifuji, T.; Kimura, Y. Elevating the Fuel Properties of Humulus Lupulus, Plumeria Alba and Calophyllum Inophyllum L. through Wet Torrefaction. *Fuel* 2015, 146, 88–94, doi:10.1016/j.fuel.2015.01.005.
12. Rodriguez Alonso, E.; Dupont, C.; Heux, L.; Da Silva Perez, D.; Commandre, J.M.; Gourdon, C. Study of Solid Chemical Evolution in Torrefaction of Different Biomasses through Solid-State <sup>13</sup>C Cross-Polarization/Magic Angle Spinning NMR (Nuclear Magnetic Resonance) and TGA (Thermogravimetric Analysis). *Energy* 2016, 97, 381–390, doi:10.1016/j.energy.2015.12.120.



13. Saffe, A.; Fernandez, A.; Mazza, G.; Rodriguez, R. Prediction of Regional Agro-Industrial Wastes Characteristics by Thermogravimetric Analysis to Obtain Bioenergy Using Thermal Process. *Energy Exploration and Exploitation* 2019, 37, 544–557, doi:10.1177/0144598718793908.
14. Wang, H.; Wang, X.; Cui, Y.; Xue, Z.; Ba, Y. Slow Pyrolysis Polygeneration of Bamboo (*Phyllostachys Pubescens*): Product Yield Prediction and Biochar Formation Mechanism. *Bioresour Technol* 2018, 263, 444–449, doi:10.1016/j.biortech.2018.05.040.
15. Zhou, H.; Long, Y.; Meng, A.; Li, Q.; Zhang, Y. The Pyrolysis Simulation of Five Biomass Species by Hemi-Cellulose, Cellulose and Lignin Based on Thermogravimetric Curves. *Thermochim Acta* 2013, 566, 36–43, doi:10.1016/j.tca.2013.04.040.
16. Naik, S.; Goud, V. V.; Rout, P.K.; Jacobson, K.; Dalai, A.K. Characterization of Canadian Biomass for Alternative Renewable Biofuel. *Renew Energy* 2010, 35, 1624–1631, doi:10.1016/j.renene.2009.08.033.
17. Wang, S.; Zou, C.; Yang, H.; Lou, C.; Cheng, S.; Peng, C.; Wang, C.; Zou, H. Effects of Cellulose, Hemicellulose, and Lignin on the Combustion Behaviours of Biomass under Various Oxygen Concentrations. *Bioresour Technol* 2021, 320, doi:10.1016/j.biortech.2020.124375.
18. Pasangulapati, V.; Ramachandriya, K.D.; Kumar, A.; Wilkins, M.R.; Jones, C.L.; Huhnke, R.L. Effects of Cellulose, Hemicellulose and Lignin on Thermochemical Conversion Characteristics of the Selected Biomass. *Bioresour Technol* 2012, 114, 663–669, doi:10.1016/j.biortech.2012.03.036.
19. Sengupta, D.; Pike, R.W. *Chemicals from Biomass: Integrating Bioprocesses into Chemical Production Complexes for Sustainable Development*; CRC Press, 2012;
20. Kerkkaiwan, S.; Buranatrevedhya, S.; Sanduang, J.; Fukuda, S. Combustion Characteristics and Fouling Tendency of Co-Combustion between Sub-Bituminous Coal and Thai Biomass. In *Proceedings of the Combustion characteristics and fouling tendency of co-combustion between sub-bituminous coal and Thai biomass*; In 9th i-CIPEC: Kyoto, Japan, 2016.
21. Raj, T.; Kapoor, M.; Gaur, R.; Christopher, J.; Lamba, B.; Tuli, D.K.; Kumar, R. Physical and Chemical Characterization of Various Indian Agriculture Residues for Biofuels Production. *Energy and Fuels* 2015, doi:10.1021/ef5027373.
22. Dhyani, V.; Bhaskar, T. A Comprehensive Review on the Pyrolysis of Lignocellulosic Biomass. *Renew Energy* 2018, 129, 695–716, doi:10.1016/j.renene.2017.04.035.
23. Mohammed, I.Y.; Abakr, Y.A.; Kazi, F.K.; Yusup, S.; Alshareef, I.; Chin, S.A. Comprehensive Characterization of Napier Grass as a Feedstock for Thermochemical Conversion. *Energies (Basel)* 2015, 8, 3403–3417, doi:10.3390/en8053403.
24. Singh, Y.D.; Mahanta, P.; Bora, U. Comprehensive Characterization of Lignocellulosic Biomass through Proximate, Ultimate and Compositional Analysis for Bioenergy Production. *Renew Energy* 2017, 103, 490–500, doi:10.1016/j.renene.2016.11.039.
25. Wannapeera, J.; Worasuwanarak, N.; Pipatmanomai, S. Product Yields and Characteristics of Rice Husk , Rice Straw and Corncob during Fast Pyrolysis in a Drop-Tube / Fixed-Bed Reactor. *Songklanakarin Journal Science and Technology* 2007, 30, 393–404, doi:papers2://publication/uuid/A115FC30-BB63-4BA1-B35B-350CE89EBB62.

26. SONIL NANDA Conversion of Lignocellulosic Feedstocks to Renewable Fuels, York University: Toronto, 2013.
27. Hernandez-Mena, L.E.; Pecora, A.A.B.; Beraldo, A.L. Slow Pyrolysis of Bamboo Biomass: Analysis of Biochar Properties. *Chem Eng Trans* 2014, 37, 115–120, doi:10.3303/CET1437020.
28. Greenhalf, C.E.; Nowakowski, D.J.; Bridgwater, A. V.; Titiloye, J.; Yates, N.; Riche, A.; Shield, I. Thermochemical Characterisation of Straws and High Yielding Perennial Grasses. *Ind Crops Prod* 2012, 36, 449–459, doi:10.1016/j.indcrop.2011.10.025.
29. Halder, P.; Kundu, S.; Patel, S.; Parthasarathy, R.; Pramanik, B.; Paz-Ferreiro, J.; Shah, K. TGA-FTIR Study on the Slow Pyrolysis of Lignin and Cellulose-Rich Fractions Derived from Imidazolium-Based Ionic Liquid Pre-Treatment of Sugarcane Straw. *Energy Convers Manag* 2019, 200, doi:10.1016/j.enconman.2019.112067.
30. M.Y. Guida, S. Lanaya, Z. Rbihi, A.H. Thermal Degradation Behaviors of Sawdust Wood Waste : Pyrolysis Kinetic and Mechanism. *Journal of Materials and Environmental Sciences* 2019.
31. Rahardjo, B.S. EFFECT OF GASIFYNG AGENT (AIR+STEAM) INJECTION TOWARDS SYNGAS QUALITY FROM RICE HUSK GASIFICATION.; 2013.
32. Aydinli, B.; Caglar, A. The Catalytic Effects of Potassium Dichromate on the Pyrolysis of Polymeric Mixtures Part II: Hazelnut Shell and Ultra-High Molecular Weight Polyethylene and Their Blend Cases. *International Journal of Materials and Metallurgical Engineering* 2010, 4, 462–466.
33. J.M. Villegas; H.Avila Quick-Scan Estimating Model of Higher Heating Value of Oil Palm Empty Fruit Bunches Based on Ash from Proximate Analysis Data. *INGENIERÍA E INVESTIGACIÓN* 2014, 34, 33–38.
34. Camacho, Y.S.; Bensaid, S.; Ruggeri, B.; Restuccia, L.; Ferro, G.; Mancini, G.; Fino, D. Valorisation of By-Products/Waste of Agro-Food Industry by the Pyrolysis Process. *Journal of Advanced Catalysis Science and Technology* 2016, 3, 1–11.
35. Guida, M.Y.; Hannioui, A. Properties of Bio-Oil and Bio-Char Produced by Sugar Cane Bagasse Pyrolysis in a Stainless Steel Tubular Reactor. *Progress in Agricultural Engineering Sciences* 2017, 13, 13–33, doi:10.1556/446.13.2017.2.
36. Lyu, G.; Wu, S.; Zhang, H. Estimation and Comparison of Bio-Oil Components from Different Pyrolysis Conditions. *Front Energy Res* 2015, 3, doi:10.3389/fenrg.2015.00028.
37. Ramos-Carmona, S.; Martínez, J.D.; Pérez, J.F. Torrefaction of Patula Pine under Air Conditions: A Chemical and Structural Characterization. *Ind Crops Prod* 2018, 118, 302–310, doi:10.1016/j.indcrop.2018.03.062.
